# Supplementary material for: Molecular basis of transport of surface functionalised gold nanoparticles to pulmonary surfactant
Source: Royal Society of Chemistry journal article supplement (doi:10.1039/d2ra01892f), 2022-01-01
Supplement: d2ra01892f1.pdf [file d2ra01892f1.pdf]

# **Electronic Supplementary Information: Molecular Basis of Transport of Surface Functionalised Gold Nanoparticles to Pulmonary Surfactant**

Fengxuan Jiao<sup>1£</sup>, Sheikh I. Hossain<sup>2£</sup>, Jianbing Sang<sup>1</sup>, Suvash C. Saha<sup>3</sup>, YuanTong Gu<sup>4</sup>,  
Zak E Hughes<sup>5\*</sup>, Neha S Gandhi<sup>6\*</sup>

<sup>1</sup>School of Mechanical Engineering, Hebei University of Technology, Tianjin 300401, PR China

<sup>2</sup>School of Life Science, University of Technology Sydney, 81 Broadway, Ultimo, NSW 2007, Australia

<sup>3</sup>School of Mechanical and Mechatronic Engineering, University of Technology Sydney, 81 Broadway, Ultimo, NSW 2007, Australia

<sup>4</sup>School of Mechanical Medical & Process Engineering, Queensland University of Technology, 2 George Street, GPO Box 2434, Brisbane, QLD 4000, Australia

<sup>5</sup>School of Chemistry and Biosciences, The University of Bradford, Bradford, BD7 1DP, UK

<sup>6</sup>Centre for Genomics and Personalised Health, School of Chemistry and Physics, Queensland University of Technology, 2 George Street, GPO Box 2434, Brisbane, QLD 4000, Australia

£ authors with equal contribution

\*Corresponding authors: Zak Hughes <Z.Hughes@bradford.ac.uk>; Neha S. Gandhi [neha.gandhi@qut.edu.au](mailto:neha.gandhi@qut.edu.au)

## Extended Simulations

In order to ensure that the simulations had equilibrated by  $\sim 750$  ns some systems were simulated for an extended to 3000 ns. Figure S1 shows the position of the Au nanoparticles (NPs) as a function of simulation time. After a short equilibration period ( $<100$  ns) the AuNPs maintain a constant position over the full 3000 ns. The surface tension (as an average over 75 ns time periods) as a function of simulation time is shown in Figure S2. While the surface tensions fluctuate an equilibrated values is typically reached by  $<500$  ns. Overall these extended simulation results confirm that 1050 ns is a suitable timescale for the determination of parameters considered in this work.

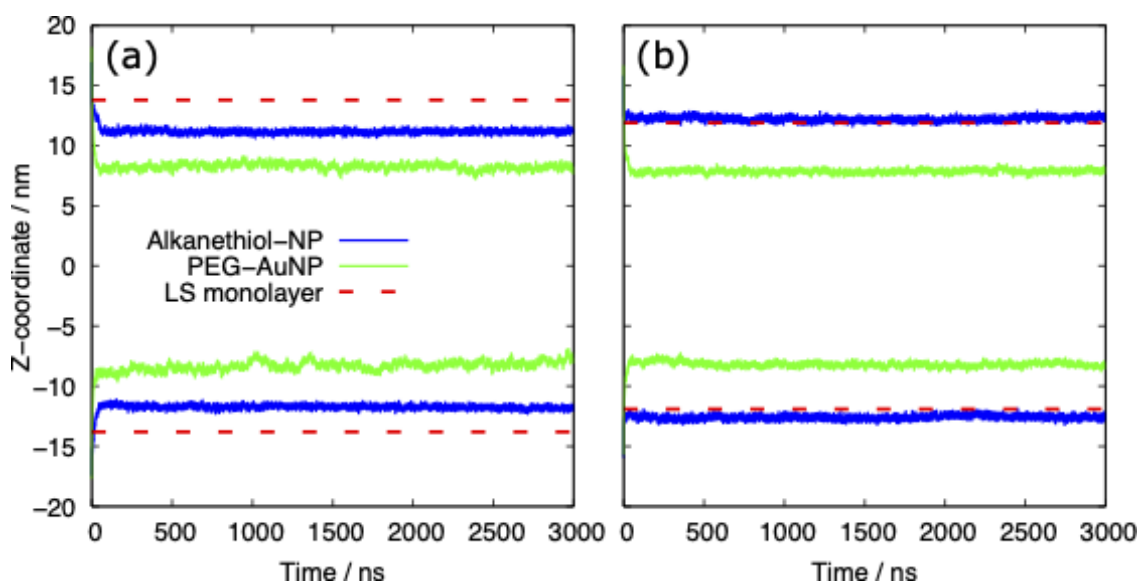

**Fig. S1:** The z-coordinate of the centre of mass of the AuNP as a function of simulation time for (a) the compressed (APL=0.48 nm<sup>2</sup>) and (b) expanded (APL=0.54 nm<sup>2</sup>) phases. The centre of mass of the lipids in each monolayer is shown by the dashed red lines. Representative data is shown for systems with a chain density of 2.33 chain nm<sup>-2</sup> and a chain length of 2.

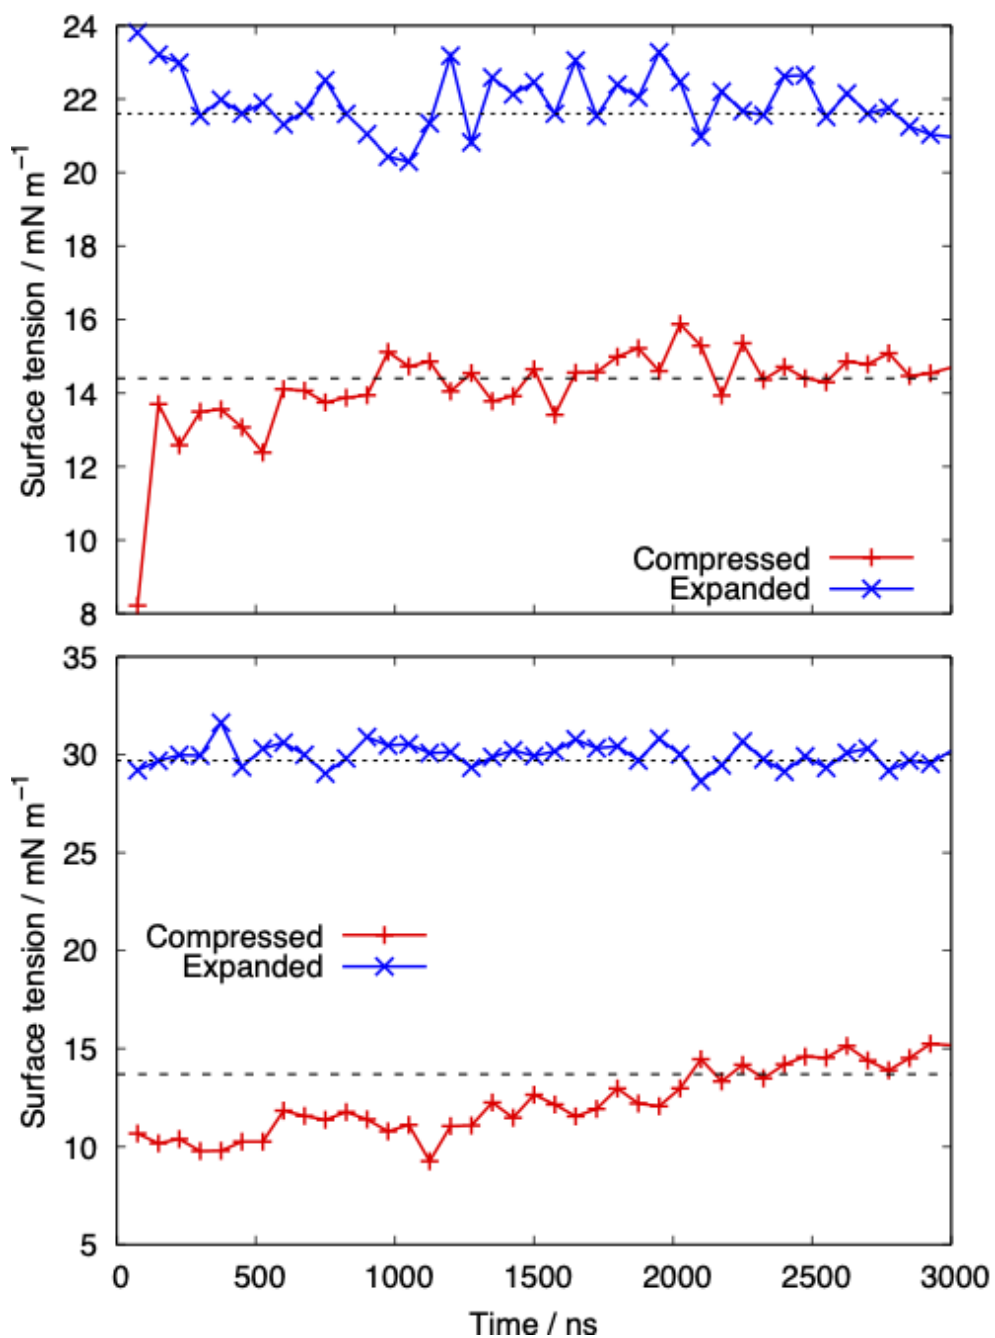

**Fig. S2:** Average of the surface tension as function of time for the extended simulations: (a) the alkanethiol AuNP systems and (b) the PEG-AuNP systems. Representative data shown for systems with a chain density of 2.33 chain nm<sup>-2</sup> and a chain length of 2. The dashed lines show the surface tension for each system determined from the average over all runs.
